# Supplementary material for: Three-Dimensional Analysis of Cell Division Orientation in Epidermal Basal Layer Using Intravital Two-Photon Microscopy
Source: PubMed Central journal article supplement (PMC5033459; doi:10.1371/journal.pone.0163199), 2016-09-22

**A** dorsum

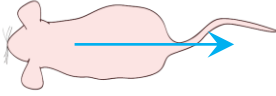

**C** ear

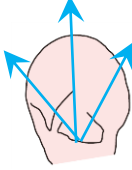

**E** hind paw

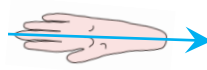

**G** tail

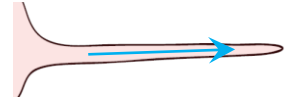

**B**

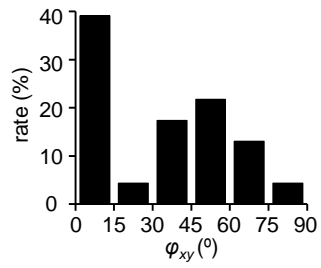

**D**

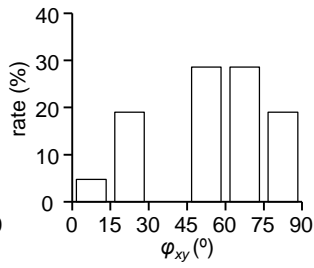

**F**

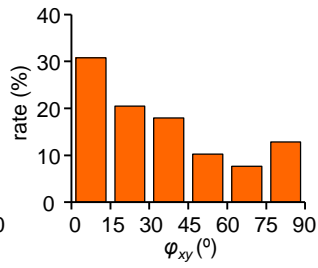

**H**

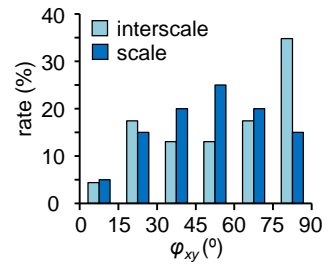

Supplement: pone.0163199.s005.pdf [file pone.0163199.s005.pdf]
