# Supplementary material for: Three-Dimensional Analysis of Cell Division Orientation in Epidermal Basal Layer Using Intravital Two-Photon Microscopy
Source: PubMed Central journal article supplement (PMC5033459; doi:10.1371/journal.pone.0163199), 2016-09-22

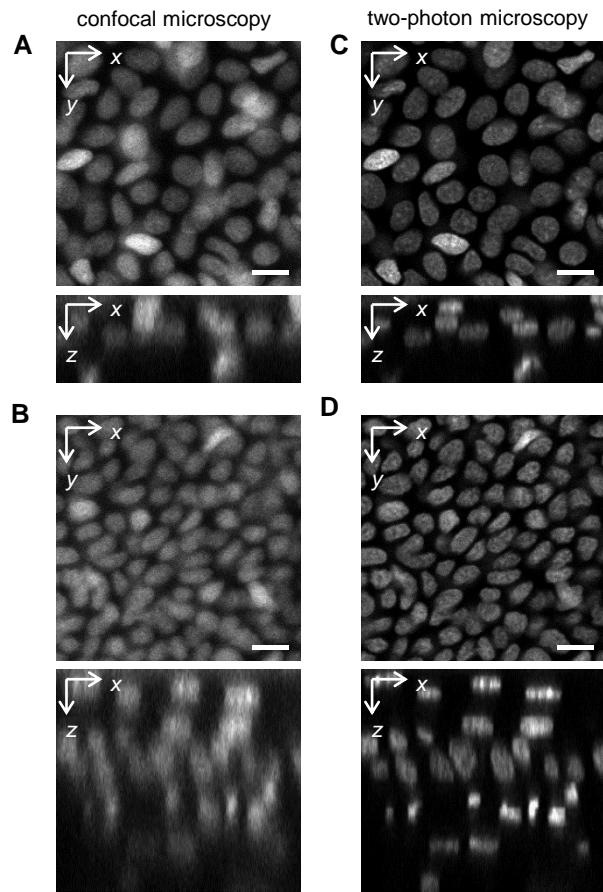

Supplement: pone.0163199.s006.pdf [file pone.0163199.s006.pdf]
