# Supplementary material for: Three-Dimensional Analysis of Cell Division Orientation in Epidermal Basal Layer Using Intravital Two-Photon Microscopy
Source: PubMed Central journal article supplement (PMC5033459; doi:10.1371/journal.pone.0163199), 2016-09-22
Supplement: pone.0163199.s012.pdf [file pone.0163199.s012.pdf]

**S2 Table. Statistical significance of the differences in the thickness of the cornified layer between the R26H2BEGFP hairless mice and littermates (See S1C Fig).**

|                   | dorsum<br>(L) | dorsum<br>(G) | ear<br>(L) | ear<br>(G) | hind paw<br>(L) | hind paw<br>(G) | interscale<br>(L) | interscale<br>(G) | scale<br>(L) | scale<br>(G) |
|-------------------|---------------|---------------|------------|------------|-----------------|-----------------|-------------------|-------------------|--------------|--------------|
| dorsum<br>(L)     | -             | n.s.          | n.s.       | n.s.       | **              | **              | **                | **                | **           | **           |
| dorsum<br>(G)     | -             | -             | n.s.       | n.s.       | **              | **              | **                | **                | **           | **           |
| ear<br>(L)        | -             | -             | -          | n.s.       | **              | **              | **                | **                | **           | **           |
| ear<br>(G)        | -             | -             | -          | -          | **              | **              | **                | **                | **           | **           |
| hind paw<br>(L)   | -             | -             | -          | -          | -               | n.s.            | n.s.              | n.s.              | n.s.         | n.s.         |
| hind paw<br>(G)   | -             | -             | -          | -          | -               | -               | *                 | n.s.              | n.s.         | n.s.         |
| interscale<br>(L) | -             | -             | -          | -          | -               | -               | -                 | n.s.              | **           | n.s.         |
| interscale<br>(G) | -             | -             | -          | -          | -               | -               | -                 | -                 | *            | n.s.         |
| scale<br>(L)      | -             | -             | -          | -          | -               | -               | -                 | -                 | -            | n.s.         |
| scale<br>(G)      | -             | -             | -          | -          | -               | -               | -                 | -                 | -            | -            |

(G) R26H2BEGFP hairless mice      (L) littermates      \*\*  $P < 0.01$     \*  $P < 0.05$     n.s.  $P \geq 0.05$
