# Supplementary material for: Three-Dimensional Analysis of Cell Division Orientation in Epidermal Basal Layer Using Intravital Two-Photon Microscopy
Source: PubMed Central journal article supplement (PMC5033459; doi:10.1371/journal.pone.0163199), 2016-09-22
Supplement: pone.0163199.s013.pdf [file pone.0163199.s013.pdf]

**S3 Table. Statistical significance of the differences in the thickness of the epidermis without the cornified layer between body regions using the Steel-Dwass test (See Fig 3I).**

|            | dorsum | ear  | hind paw | interscale | scale |
|------------|--------|------|----------|------------|-------|
| dorsum     | -      | n.s. | **       | **         | **    |
| ear        | -      | -    | **       | **         | **    |
| hind paw   | -      | -    | -        | n.s.       | **    |
| interscale | -      | -    | -        | -          | **    |
| scale      | -      | -    | -        | -          | -     |

\*\*  $P < 0.01$    \*  $P < 0.05$    n.s.  $P \geq 0.05$
